# Supplementary material for: Comparative Analysis of the Pre-Parturition and Post-Parturition Genital Tract Microbiota in Plateau Bangor Sewa Sheep
Source: MDPI journal article supplement (doi:10.3390/vetsci10080523), 2023-08-14
Supplement: s1 [file s1]

**Supplementary Materials:**

**Table S1.** Analysis of Bangor Sewa sheep sequencing data.

| Group            | Sample ID | Raw Reads | Clean Reads | Denoised Reads | Merged Reads | Non-chimeric Reads |
|------------------|-----------|-----------|-------------|----------------|--------------|--------------------|
| pre-parturition  | A1        | 80008     | 79685       | 76034          | 70092        | 64288              |
|                  | A2        | 79579     | 79260       | 75915          | 70229        | 66540              |
|                  | A3        | 54685     | 54463       | 50392          | 42458        | 39560              |
|                  | A4        | 80029     | 79715       | 75826          | 68444        | 63350              |
|                  | A5        | 80039     | 79749       | 76535          | 71511        | 65437              |
|                  | A6        | 80290     | 80007       | 76965          | 72049        | 69869              |
|                  | A7        | 79873     | 79552       | 71249          | 56502        | 49857              |
|                  | A8        | 79846     | 79500       | 77639          | 75605        | 72509              |
|                  | A9        | 79944     | 79638       | 73129          | 60180        | 53488              |
|                  | A10       | 79866     | 79536       | 75782          | 68955        | 63699              |
| post-parturition | B1        | 80292     | 79976       | 77835          | 74239        | 71246              |
|                  | B2        | 79615     | 79275       | 75437          | 69451        | 64366              |
|                  | B3        | 79992     | 79627       | 77368          | 73891        | 69906              |
|                  | B4        | 80111     | 79832       | 77824          | 75549        | 71733              |
|                  | B5        | 79925     | 79614       | 76767          | 72147        | 68473              |
|                  | B6        | 66461     | 66173       | 63712          | 60614        | 58494              |
|                  | B7        | 79879     | 79589       | 74373          | 65928        | 60776              |
|                  | B8        | 79980     | 79633       | 77555          | 75084        | 70138              |
|                  | B9        | 74558     | 74277       | 73243          | 71341        | 68868              |
|                  | B10       | 79626     | 79321       | 75328          | 68303        | 62639              |

**Table S2.** Statistical analysis of Alpha diversity indices of Bangor Sewa sheep.

| Group            | Sample | Feature | ACE       | Chao1     | Simpson | Shannon | PD_whole_tree |
|------------------|--------|---------|-----------|-----------|---------|---------|---------------|
| pre-parturition  | A1     | 1372    | 1372.3307 | 1372.0213 | 0.9689  | 7.9589  | 140.4025      |
|                  | A2     | 1330    | 1330.1819 | 1330.0000 | 0.9372  | 7.2881  | 152.6300      |
|                  | A3     | 1357    | 1357.1915 | 1357.0000 | 0.9958  | 9.2154  | 182.3420      |
|                  | A4     | 1494    | 1494.5995 | 1494.0435 | 0.9575  | 7.6686  | 315.3979      |
|                  | A5     | 1500    | 1500.3697 | 1500.0179 | 0.9924  | 8.8508  | 307.5412      |
|                  | A6     | 1036    | 1036.1727 | 1036.0000 | 0.7522  | 4.9204  | 151.4822      |
|                  | A7     | 2473    | 2473.1993 | 2473.0000 | 0.9983  | 10.2448 | 161.001       |
|                  | A8     | 1063    | 1063.0000 | 1063.0000 | 0.9958  | 9.1543  | 192.5915      |
|                  | A9     | 1714    | 1714.0000 | 1714.0000 | 0.9958  | 9.2756  | 123.3023      |
|                  | A10    | 1871    | 1871.1589 | 1871.0000 | 0.9956  | 9.4306  | 155.5691      |
| post-parturition | B1     | 1197    | 1197.2293 | 1197.0000 | 0.9963  | 9.3077  | 240.9322      |
|                  | B2     | 1300    | 1300.6455 | 1300.0429 | 0.9918  | 8.5814  | 268.8573      |
|                  | B3     | 1425    | 1425.4083 | 1425.0476 | 0.9963  | 9.4703  | 111.7690      |
|                  | B4     | 244     | 244.5821  | 244.0345  | 0.6677  | 2.4373  | 104.5365      |
|                  | B5     | 1488    | 1488.2008 | 1488.0000 | 0.9949  | 9.3637  | 91.8396       |
|                  | B6     | 1210    | 1210.0000 | 1210.0000 | 0.9952  | 9.1576  | 241.3505      |
|                  | B7     | 1564    | 1564.0000 | 1564.0000 | 0.9921  | 8.9000  | 220.4017      |
|                  | B8     | 275     | 275.4582  | 275.0357  | 0.6928  | 2.6515  | 181.1489      |
|                  | B9     | 583     | 583.0000  | 583.0000  | 0.9632  | 6.9359  | 81.0445       |
|                  | B10    | 1669    | 1669.0000 | 1669.0000 | 0.992   | 8.8032  | 268.8573      |

**Table S3.** Comparing the microbiota KEGG function between the two Bangor Sewa sheep groups. Data are presented as the mean  $\pm$  SEM ( $n = 10$ ).

| KEGG level | Function                                              | A (Relative frequency, %) | A (Relative frequency, %) | P value |
|------------|-------------------------------------------------------|---------------------------|---------------------------|---------|
| Level 1    | Human Diseases                                        | 2.6562 $\pm$ 0.1060       | 2.9458 $\pm$ 0.3045       | 0.0206  |
|            | Environmental Information Processing                  | 6.7557 $\pm$ 0.2027       | 7.3421 $\pm$ 0.7478       | 0.0458  |
| Level 2    | Transport and catabolism                              | 0.2740 $\pm$ 0.0117       | 0.2405 $\pm$ 0.0391       | 0.0325  |
|            | Energy metabolism                                     | 4.1545 $\pm$ 0.0496       | 4.0939 $\pm$ 0.0647       | 0.0396  |
|            | mRNA surveillance pathway                             | 0.0001 $\pm$ 0.0000       | 0.0000 $\pm$ 0.0000       | 0.0009  |
|            | Adipocytokine signaling pathway                       | 0.0773 $\pm$ 0.0080       | 0.0599 $\pm$ 0.0135       | 0.0048  |
|            | Basal transcription factors                           | 0.0044 $\pm$ 0.0023       | 0.0016 $\pm$ 0.0012       | 0.0055  |
|            | Steroid biosynthesis                                  | 0.0029 $\pm$ 0.0011       | 0.0014 $\pm$ 0.0009       | 0.0055  |
|            | Fatty acid elongation                                 | 0.0004 $\pm$ 0.0002       | 0.0001 $\pm$ 0.0001       | 0.0057  |
|            | Renin-angiotensin system                              | 0.0136 $\pm$ 0.0025       | 0.0084 $\pm$ 0.0041       | 0.0059  |
|            | Steroid degradation                                   | 0.0055 $\pm$ 0.0028       | 0.0022 $\pm$ 0.0014       | 0.0081  |
|            | cAMP signaling pathway                                | 0.0035 $\pm$ 0.0020       | 0.0013 $\pm$ 0.0010       | 0.0091  |
|            | Non-homologous end-joining                            | 0.0213 $\pm$ 0.0067       | 0.0122 $\pm$ 0.0066       | 0.0095  |
|            | Calcium signaling pathway                             | 0.0002 $\pm$ 0.0001       | 0.0001 $\pm$ 0.0001       | 0.0107  |
| Level 3    | Stilbenoid, diarylheptanoid and gingerol biosynthesis | 0.0067 $\pm$ 0.0017       | 0.0039 $\pm$ 0.0025       | 0.0113  |
|            | Peroxisome                                            | 0.2116 $\pm$ 0.0207       | 0.1841 $\pm$ 0.0210       | 0.0118  |
|            | Longevity regulating pathway - multiple species       | 0.1145 $\pm$ 0.0118       | 0.1009 $\pm$ 0.0103       | 0.0184  |
|            | Citrate cycle (TCA cycle)                             | 0.6575 $\pm$ 0.0367       | 0.5871 $\pm$ 0.0716       | 0.0205  |
|            | MAPK signaling pathway - yeast                        | 0.0232 $\pm$ 0.0068       | 0.0157 $\pm$ 0.0059       | 0.0222  |
|            | Hematopoietic cell lineage                            | 0.0002 $\pm$ 0.0001       | 0.0001 $\pm$ 0.0001       | 0.0250  |
|            | Nonribosomal peptide structures                       | 0.0142 $\pm$ 0.0023       | 0.0108 $\pm$ 0.0034       | 0.0264  |
|            | PPAR signaling pathway                                | 0.1747 $\pm$ 0.0167       | 0.1502 $\pm$ 0.0269       | 0.0347  |
|            | Sesquiterpenoid and triterpenoid biosynthesis         | 0.0036 $\pm$ 0.0006       | 0.0025 $\pm$ 0.0013       | 0.0412  |
|            | Systemic lupus erythematosus                          | 0.0006 $\pm$ 0.0003       | 0.0003 $\pm$ 0.0002       | 0.0458  |
|            | Bacterial secretion system                            | 0.6259 $\pm$ 0.0360       | 0.6912 $\pm$ 0.0811       | 0.0466  |

**Table S4.** Comparing the microbiota FAPROTAX function between the two Bangor Sewa sheep groups. Data are presented as the mean  $\pm$  SEM ( $n = 10$ ).

| Function                 | A (Relative frequency, %) | A (Relative frequency, %) | P value |
|--------------------------|---------------------------|---------------------------|---------|
| dark_sulfide_oxidation   | 0.0231 $\pm$ 0.0189       | 0.0000 $\pm$ 0.0000       | 0.0052  |
| cellulolysis             | 0.1744 $\pm$ 0.0961       | 0.0656 $\pm$ 0.0624       | 0.0120  |
| cyanobacteria            | 1.1932 $\pm$ 0.4300       | 0.6047 $\pm$ 0.5570       | 0.0226  |
| oxygenic_photoautotrophy | 1.1932 $\pm$ 0.4300       | 0.6047 $\pm$ 0.5570       | 0.0226  |
| reductive_acetogenesis   | 0.0187 $\pm$ 0.0168       | 0.0039 $\pm$ 0.0118       | 0.0471  |

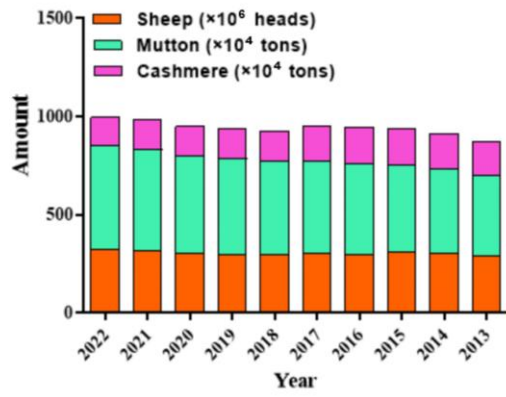

**Figure S1.** The sheep breeding information in China during 2013-2022.

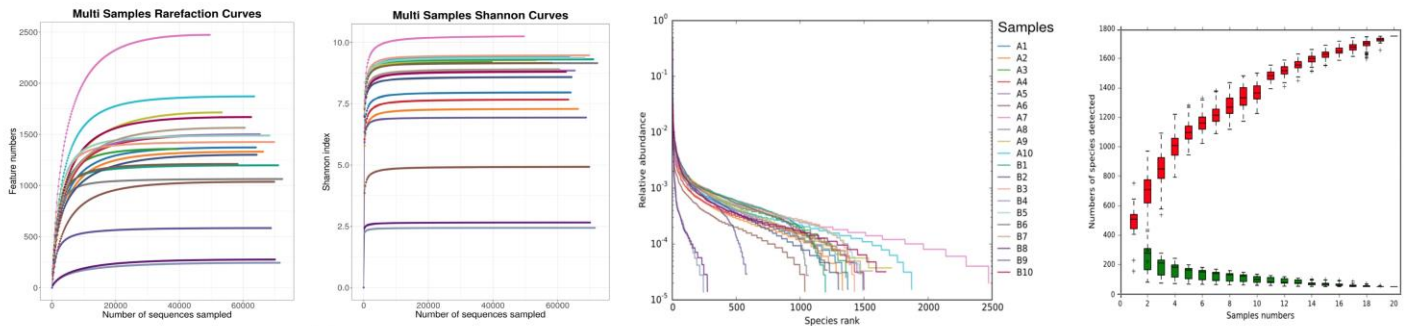

**Figure S2.** The Rarefaction curve, Shannon index curve, Rank abundance curve and Species accumulation curve of Bangor Sewa sheep sequencing data. A1-A10 represented samples from pre-parturition group, and B1-B10 were samples from the post-parturition group.

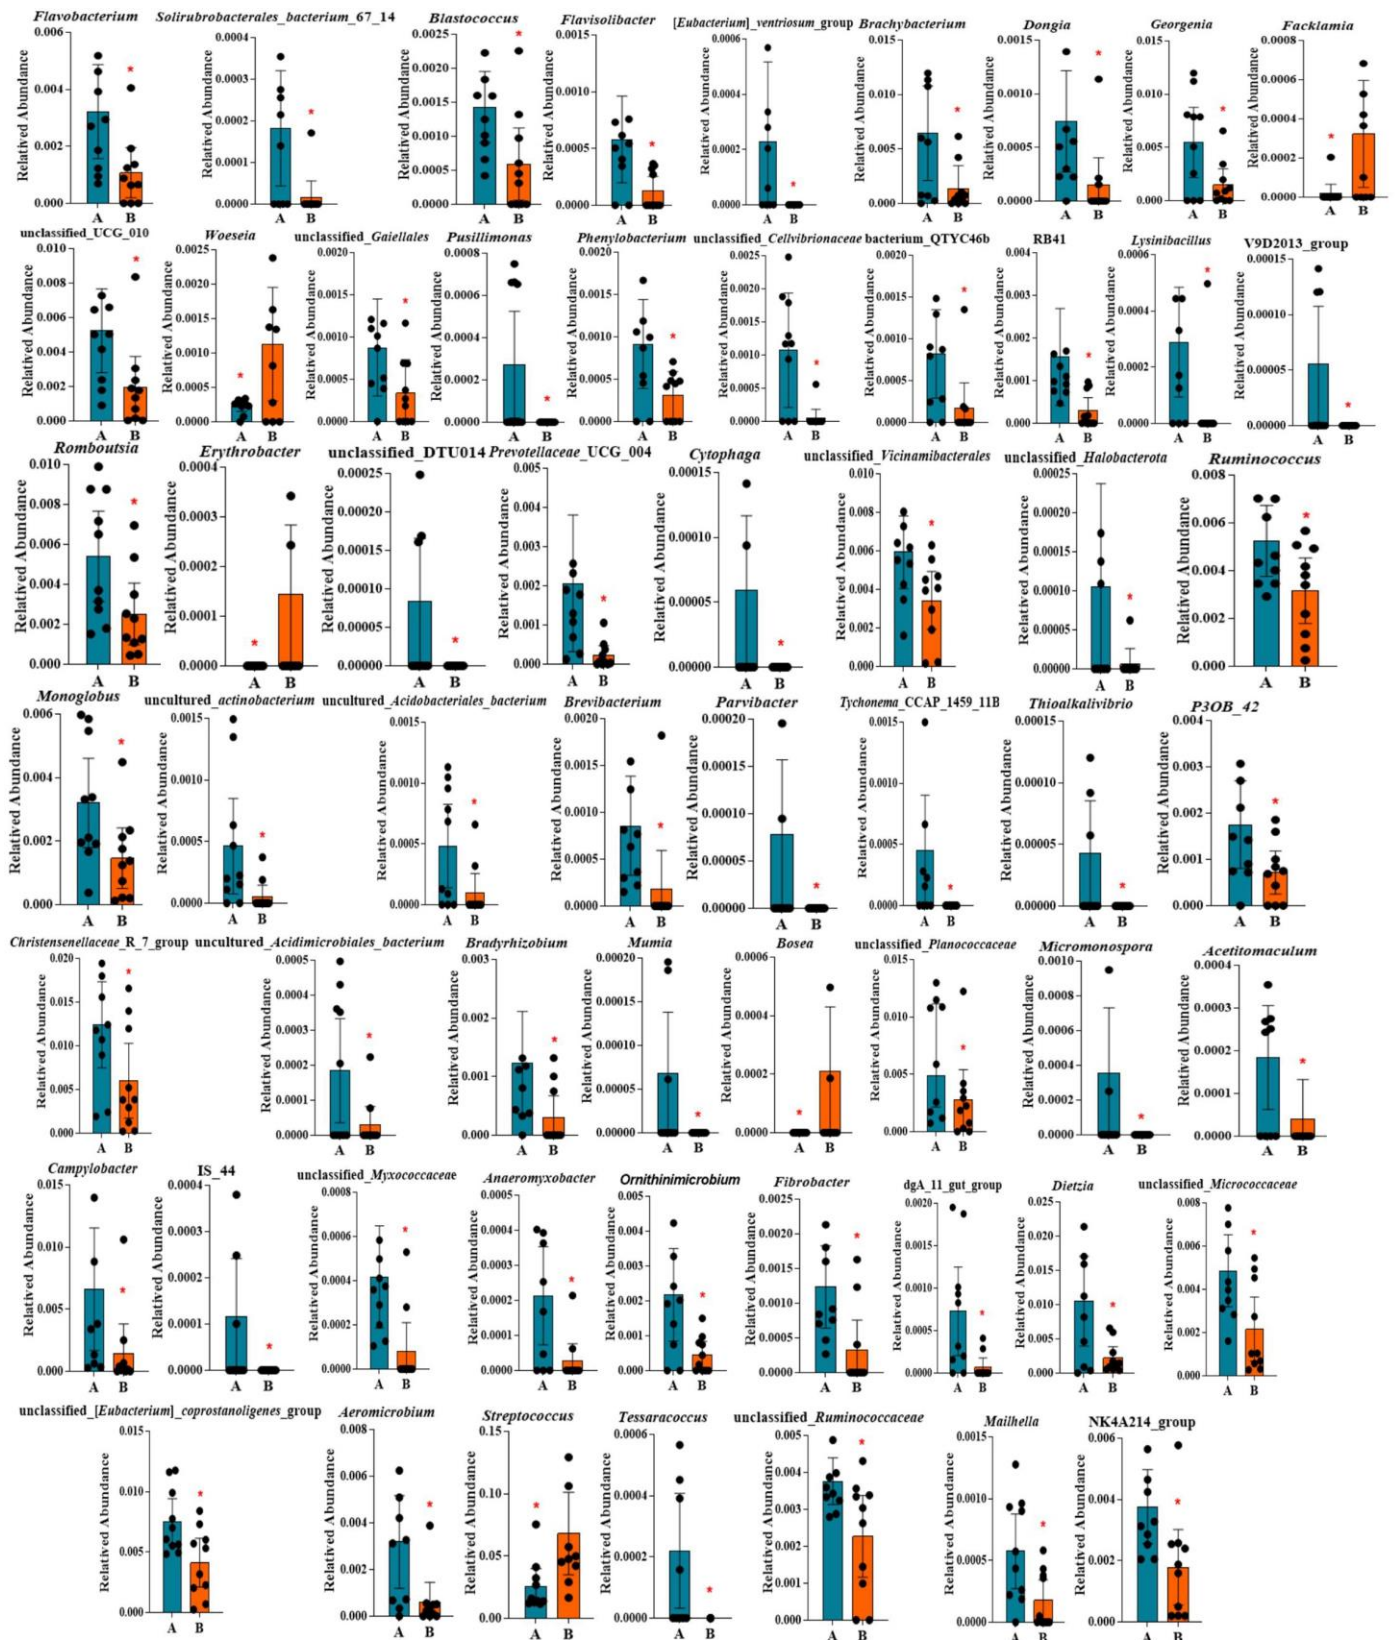

**Figure S3.** Obviously changed genus between the two Bangor Sewa sheep groups analyzed by ANOVA. A represented pre-parturition group, and B represented post-parturition group. Significance is presented as \* $p < 0.05$ . Data are presented as the mean  $\pm$  SEM ( $n = 10$ ).

### *Escherichia\_Shigella*

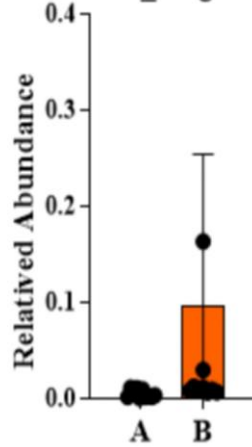

**Figure S4.** Comparing of the abundance of *Escherichia\_Shigella* between the two Bangor Sewa sheep groups. A represented pre-parturition group, and B represented post-parturition group. Significance is presented as \* $p < 0.05$ . Data are presented as the mean  $\pm$  SEM (n = 10).

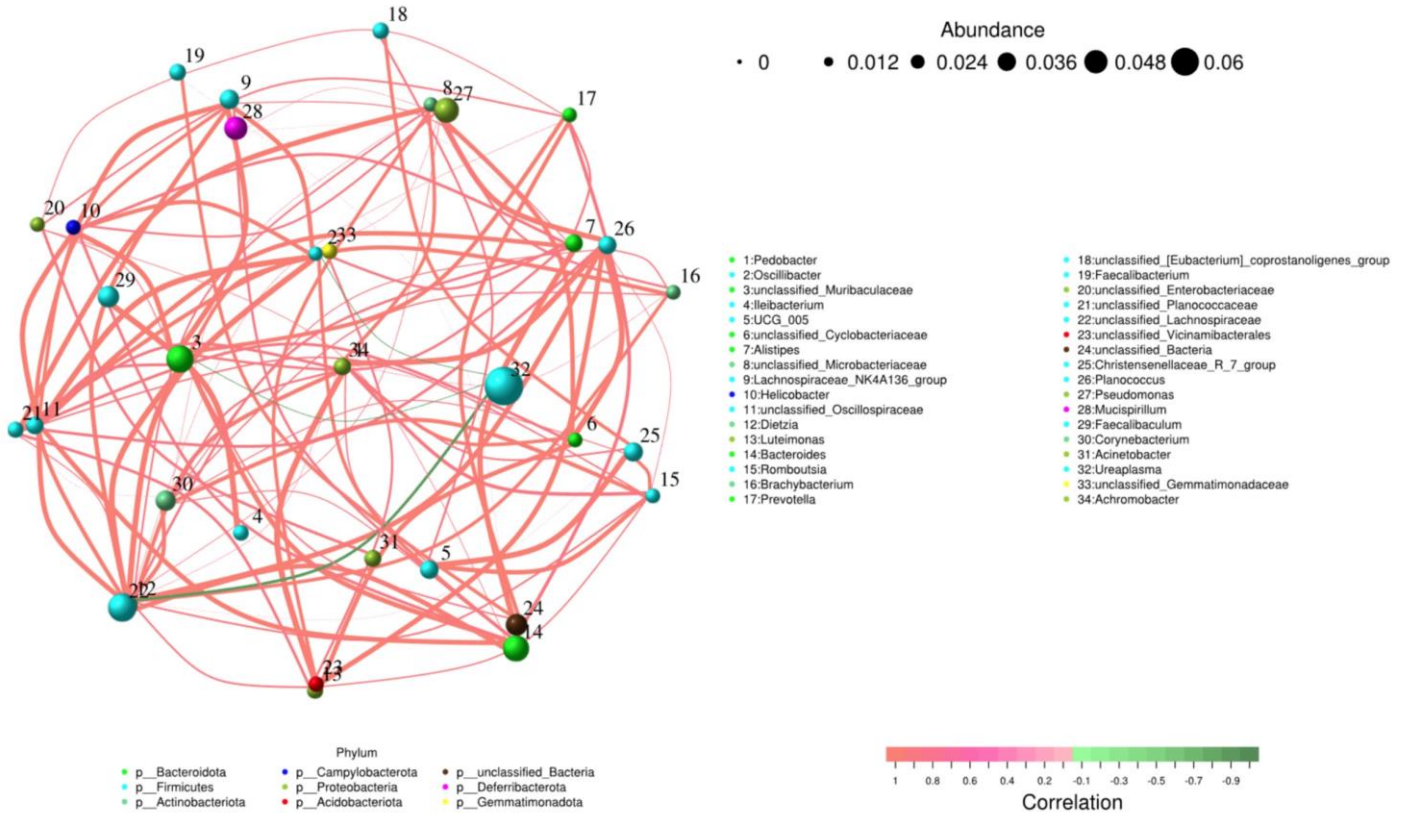

**Figure S5.** Network analyzing of the bacteria in Bangor Sewa sheep groups.
